# Supplementary material for: Digital microfluidics using soft lithography
Source: Royal Society of Chemistry journal article supplement (doi:10.1039/b510127a), 2005-11-29
Supplement: b510127a.pdf [file b510127a.pdf]

Supporting information for Lab on a Chip article B510127A

"Digital Microfluidics using Soft Lithography"

John Paul Urbanski, William Thies, Christopher Rhodes, Saman Amarasinghe and Todd Thorsen

Movie 1: "B510127A - movie 1 - latch example close up"

This movie provides a demonstration of the microfluidic latching mechanism which is described in the paper. An aqueous sample is dispensed into a pressurized oil stream, and then caught downstream by an activated latch. Once the latch is released, the sample continues to flow downstream.

Movie 2: "B510127A - movie 2 - latch example overview"

The latching mechanism is demonstrated again, illustrating that the latch allows emulsified samples to be trapped under the presence of a continuous oil pressure.
